# Supplementary material for: The Lactate/Hematocrit Ratio and Prognosis in ICU Patients with Acute Myocardial Infarction: A Retrospective Cohort Study
Source: Research Square preprint supplement (doi:10.21203/rs.3.rs-7858298/v1), 2025-12-17
Supplement: Supplementary file 1 [file 06f076251b1171e22800a78d.docx]

| Categories | Model1 |  |  |  | Model2 |  |  |  | Model3 |  |  |
| --- | --- | --- | --- | --- | --- | --- | --- | --- | --- | --- | --- |
|  | HR (95% CI) | P-value | P for trend |  | HR (95% CI) | P-value | P for trend |  | HR (95% CI) | P-value | P for trend |
| ICU 28 days mortality |  |  |  |  |  |  |  |  |  |  |  |
| Quartile |  |  | <0.001 |  |  |  | <0.001 |  |  |  | <0.001 |
| Q1 (N = 721) | Ref |  |  |  |  |  |  |  |  |  |  |
| Q2 (N = 721) | 1.261(0.832–1.911) | 0.274 |  |  | 1.227(0.809–1.86) | 0.335 |  |  | 1.099 (0.722–1.674) | 0.659 |  |
| Q3 (N = 721) | 1.52(1.017–2.27) | 0.041 |  |  | 1.438 (0.961–2.151) | 0.077 |  |  | 1.11 (0.736–1.673) | 0.618 |  |
| Q4 (N = 721) | 3.011 (2.095–4.328) | <0.001 |  |  | 2.76 (1.915–3.979) | <0.001 |  |  | 1.825 (1.248–2. 669) | 0.002 |  |
| ICU 360 days mortality |  |  |  |  |  |  |  |  |  |  |  |
| Quartile |  |  | <0.001 |  |  |  | <0.001 |  |  |  | <0.001 |
| Q1 (N = 721) | Ref |  |  |  |  |  |  |  |  |  |  |
| Q2 (N = 721) | 1.08(0.753-1.55) | 0.674 |  |  | 1.053(0.734-1.512) | 0.778 |  |  | 0.956(0.664-1.378) | 0.811 |  |
| Q3(N = 721) | 1.36(0.964-1.919) | 0.08 |  |  | 1.283(0.908-1.813) | 0.157 |  |  | 1.015(0.713-1.443) | 0.935 |  |
| Q4 (N = 721) | 2.537(1.857-3.467) | <0.001 |  |  | 2.322(1.695-3.181) | <0.001 |  |  | 1.599(1.152-2.22) | 0.005 |  |

Table S1:

Cox proportional hazard ratios (HR) for all-cause mortality

Note: Model 1: Unadjusted. Model 2: Adjusted for age, sex, BMI. Model 3: Further adjusted for age, sex, BMI, SOFA, heart failure, type 2 diabetes, acute kidney injury, chronic kidney disease, hypertension, atrial fibrillation, WBC, blood glucose, blood sodium, blood potassium, BUN on the basis of Model 2.
